# Supplementary material
Source: Copernicus journal article supplement (doi:10.5194/egusphere-2026-3368)
Supplement: Supplementary file 1 [file egusphere-2026-3368-supplement.pdf]

## Supplementary Material

### Enhancing the advection module performance in the EPIC-Model V1.6.0 via GPU-HADVPPM4HIP V1.0 coupling and GPU-optimized strategies

Kai Cao<sup>1</sup>, Qizhong Wu<sup>2</sup>, Xiao Tang<sup>1,3</sup>, Jinxi Li<sup>1</sup>, Xueshun Chen<sup>1,3</sup>, Huansheng Chen<sup>1</sup>, Wending Wang<sup>1</sup>, Huangjian Wu<sup>1</sup>, Lei Kong<sup>1</sup>, Jie Li<sup>1,3</sup>, Jiang Zhu<sup>1,3</sup>, and Zifa Wang<sup>1,3</sup>

<sup>1</sup>State Key Laboratory of Atmospheric Environment and Extreme Meteorology, Institute of Atmospheric Physics, Chinese Academy of Sciences, Beijing 100029, China

<sup>2</sup>College of Global Change and Earth System Science, Faculty of Geographical Science, Beijing Normal University, Beijing 100875, China

<sup>3</sup>College of Earth and Planetary Sciences, University of Chinese Academy of Sciences, Beijing, 100049, China

**Correspondence to:** Qizhong Wu ([wqizhong@bnu.edu.cn](mailto:wqizhong@bnu.edu.cn)); Xiao Tang ([tangxiao@mail.iap.ac.cn](mailto:tangxiao@mail.iap.ac.cn))

1. The formulas for calculating the root mean square error (RMSE) and correlation coefficient are :

$$\text{RMSE} = \sqrt{\frac{1}{n} \sum_{i=1}^n (M_i - O_i)^2}$$
$$R = \frac{\sum_{i=1}^n (M_i - \bar{M})(O_i - \bar{O})}{\sqrt{\sum_{i=1}^n (M_i - \bar{M})^2} \sqrt{\sum_{i=1}^n (O_i - \bar{O})^2}}$$

where  $M_i$  and  $O_i$  are simulated and observed concentrations, respectively;  $\bar{M}$  and  $\bar{O}$  are the simulated and observed mean concentrations, respectively; and  $n$  is the total number of individual observations.
